### 1950. Prevention of Recurrent *Clostridium difficile* at Six Months Following Treatment With Microbiota-Based Therapy RBX2660: Durability Results From a Phase 2 Open-Label Study

Sarah Mische, PhD<sup>1</sup>; Robert Orenstein, DO, FIDSA<sup>2</sup>; Erik R. Dubberke, MD, MSPH, FIDSA, FSHEA<sup>3</sup>; Sahil Khanna, MBBS, MS<sup>4</sup>; Gail Hecht, MD<sup>5</sup>; Herbert Dupont, MD, FIDSA<sup>6</sup>; Christine Lee, MD, FRCPC<sup>7</sup> and Ken Blount, PhD<sup>1</sup>; <sup>1</sup>Rebiotix, Inc., Roseville, Minnesota, <sup>2</sup>Infectious Diseases, Mayo Clinic Arizona, Phoenix, Arizona, <sup>3</sup>Washington University School of Medicine, St. Louis, Missouri, <sup>4</sup>Gastroenterology and Hepatology, Mayo Clinic, Rochester, Minnesota, <sup>5</sup>Division of Gastroenterology and Nutrition, Loyola University Medical Center, Maywood, Illinois, <sup>6</sup>St. Luke's Hospital and Kelsey Research Foundation and Kelsey-Seybold Clinic, Houston, Texas, <sup>7</sup>McMaster University, Hamilton, ON, Canada

Session: 227. Clinical Trials

Saturday, October 6, 2018: 12:30 PM

**Background.** Numerous microbiota-based therapies are being evaluated for prevention of *C. difficile* infection (rCDI), a public health threat with high recurrence rates associated with the current standard of care. RBX2660, a standardized microbiota-based drug, was efficacious for preventing rCDI in a double-blinded Phase 2b clinical study (PUNCH CD 2). Herein we report the durability of RBX2660 beyond the initial primary clinical end-point of a subsequent Phase 2 open-label study, demonstrating rCDI prevention at 6 months post-treatment.

**Methods.** This prospective, multi-center, open-label Phase 2 study enrolled subjects who had experienced either ≥2 recurrences of CDI following standard-of-care antibiotic therapy or ≥2 episodes of severe CDI requiring hospitalization. Participants received up to two doses of RBX2660 delivered via enema with doses 7 days apart. The primary endpoint of the open-label clinical study defined efficacy as absence of CDI at 8 weeks from the last dose. Safety follow-ups and durability assessments occurred via telephone at 3, 6, 12, and 24 months. The study is ongoing, and not all subjects have completed their assessments.

**Results.** This study included 149 RBX2660-treated subjects and 110 historical control subjects from 31 and 4 centers, respectively, in the United States and Canada. At 8-weeks post-treatment, RBX2660's efficacy in preventing rCDI (79.9%; 119/149) was higher than CDI-free rates in the historical control group (51.8%; 57/110;  $P < 0.001$ ). Of the 119 subjects who were determined to be treatment success at 8 weeks, 117 have data through 6 months, of which 8 were exited for non-CDI reasons. Of those 109 subjects through the 6-month follow-up, 3 (2.8%) had a new CDI beyond 8 weeks after enema. The 6-month long-term CDI-free rate was 97.2% (106/109) (median follow-up: 182 days; mean: 177 days).

**Conclusion.** RBX2660, a microbiota-based drug, was efficacious for the prevention of recurrent CDI with long-term durability at 6-months post-treatment; a result consistent with 6-month rCDI prevention reported for the Phase 2b PUNCH CD 2 trial. Long-term follow-up of RBX2660 safety and efficacy 24 months is ongoing.

**This analysis was funded by Rebiotix Inc.,** Roseville, MN.

**Disclosures.** S. Mische, Rebiotix, Inc.: Employee, Salary. R. Orenstein, Rebiotix, Inc.: Scientific Advisor, Consulting fee. E. R. Dubberke, Rebiotix, Inc.: Scientific Advisor, Consulting fee. S. Khanna, Rebiotix, Inc.: Scientific Advisor, Consulting fee and Research support. G. Hecht, Rebiotix, Inc.: Scientific Advisor, Consulting fee. H. Dupont, Rebiotix, Inc.: Investigator, Research support. C. Lee, Rebiotix, Inc.: Scientific Advisor, Consulting fee. K. Blount, Rebiotix, Inc.: Employee, Salary.

### 1951. Nephrotoxicity Associated With Imipenem/Cilastatin/Relebactam (IMI/REL) vs. Imipenem/Cilastatin Plus Colistin (IMI+CST) in Patients With Imipenem-Nonsusceptible (NS) Bacterial Infections

Michelle Brown, RN<sup>1</sup>; Johann Motsch, MD<sup>2</sup>; Keith Kaye, MD, MPH<sup>3</sup>; Thomas File, MD<sup>4</sup>; Helen W. Boucher, MD, FIDSA<sup>5</sup>; Neika Vendetti, MPH<sup>1</sup>; Angela Aggrey, PhD<sup>1</sup>; Hee-Koung Joeng, PhD<sup>1</sup>; Robert Tipping, MS<sup>1</sup>; Jiejun Du, PhD<sup>1</sup>; Daryl D. Depestel, PharmD, BCPS-ID<sup>1</sup>; Joan Butterton, MD<sup>1</sup>; Nicholas A. Kartsonis, MD<sup>1</sup> and Amanda Paschke, MD, MSCE<sup>1</sup>; <sup>1</sup>Merck & Co., Inc., Kenilworth, New Jersey, <sup>2</sup>Universitätsklinikum Heidelberg, Heidelberg, Germany, <sup>3</sup>University of Michigan, Ann Arbor, Michigan, <sup>4</sup>Summa Health System, Akron, Ohio, <sup>5</sup>Infectious Diseases, Tufts Medical Center, Boston, Massachusetts

Session: 227. Clinical Trials

Saturday, October 6, 2018: 12:30 PM

**Background.** Nephrotoxicity is a common complication of CST-based therapy, limiting its use to treat carbapenem-resistant bacterial infections. REL is a novel β-lactamase inhibitor that restores imipenem activity against many imipenem-NS strains of Gram-negative pathogens. IMI/REL was shown to be as effective but better tolerated than IMI+CST in the phase 3 RESTORE-IMI 1 study (NCT02452047), including a lower incidence of treatment-emergent nephrotoxicity (prespecified secondary endpoint). Here we present additional renal safety data from that trial.

**Methods.** Randomized, active-controlled, double-blind, phase 3 trial in adults with infections caused by ≥1 imipenem-NS (but CST- and IMI/REL-susceptible) pathogen. Treatment (2:1) was IMI/REL or IMI+CST for 5–21 days in complicated intra-abdominal infection and complicated urinary tract infection and 7–21 days in hospital-acquired/ventilator-associated bacterial pneumonia. For baseline serum creatinine (Cr) <1.2 mg/dL, nephrotoxicity was defined as a doubling of serum Cr to >1.2 mg/dL OR decrease in Cr clearance [CrCl] ≥50%; for Cr ≥1.2 mg/dL, nephrotoxicity was defined as an increase in serum Cr ≥1 mg/dL OR decrease from baseline in CrCl ≥20% OR need for renal replacement therapy. KDIGO and RIFLE criteria of acute kidney injury (AKI) were applied to the data; renal-related adverse events (AEs) were analyzed.

**Results.** A total of 47 patients were randomized, treated (31 IMI/REL, 16 IMI+CST), and included in this analysis. A significantly smaller percentage of patients in the IMI/REL than the IMI+CST group experienced protocol-defined nephrotoxicity (% difference: -45.9 [95% CI: -69.1, -18.4];  $P = 0.002$ ) during study treatment and the 14-day follow-up period (table). These results were confirmed by applying KDIGO and RIFLE criteria, with no patients in the IMI/REL group in stage 3 AKI or failure compared with 31.3% and 25.0%, respectively, in the IMI+CST group. Fewer renal AEs, including discontinuations due to renal events, were observed in the IMI/REL group.

**Conclusion.** IMI/REL demonstrates a more favorable renal safety profile compared with CST-based therapy, as demonstrated by a lower incidence of treatment-emergent nephrotoxicity and AKI with IMI/REL across several different analyses.

| Table. Protocol-specified nephrotoxicity and renal AEs                |                 |                     |                  |                      |
|-----------------------------------------------------------------------|-----------------|---------------------|------------------|----------------------|
|                                                                       | IMI/REL<br>N=31 |                     | IMI+CST*<br>N=16 |                      |
|                                                                       | n/m             | %<br>(95% CI)       | n/m              | %<br>(95% CI)        |
| <b>Protocol-specified nephrotoxicity</b>                              | 3/29            | 10.3<br>(2.8, 27.2) | 9/16             | 56.3<br>(33.2, 76.9) |
| <b>AKI (KDIGO)</b>                                                    | <b>n/m</b>      | <b>%</b>            | <b>n/m</b>       | <b>%</b>             |
| Stage 1                                                               | 5/29            | 17.2                | 6/16             | 37.5                 |
| Stage 2                                                               | 1/29            | 3.4                 | 2/16             | 12.5                 |
| Stage 3                                                               | 0/29            | 0                   | 5/16             | 31.3                 |
| <b>AKI (RIFLE)</b>                                                    | <b>n/m</b>      | <b>%</b>            | <b>n/m</b>       | <b>%</b>             |
| Risk                                                                  | 3/29            | 10.3                | 6/16             | 37.5                 |
| Injury                                                                | 1/29            | 3.4                 | 2/16             | 12.5                 |
| Failure                                                               | 0/29            | 0                   | 4/16             | 25.0                 |
| <b>Renal AEs*</b>                                                     | <b>n/m</b>      | <b>%</b>            | <b>n/m</b>       | <b>%</b>             |
| Blood Cr increased                                                    | 0/31            | 0                   | 4/16             | 25.0                 |
| Blood urea increased                                                  | 0/31            | 0                   | 1/16             | 6.3                  |
| CrCl decreased                                                        | 2/31            | 6.5                 | 2/16             | 12.5                 |
| GFR decreased                                                         | 0/31            | 0                   | 1/16             | 6.3                  |
| Acute kidney injury                                                   | 1/31            | 3.2                 | 0/16             | 0                    |
| Renal failure                                                         | 1/31            | 3.2                 | 0/16             | 0                    |
| <b>Drug-related renal AEs leading to discontinuation of treatment</b> | <b>n/m</b>      | <b>%</b>            | <b>n/m</b>       | <b>%</b>             |
| Blood Cr increased                                                    | 0/31            | 0                   | 1/16             | 6.3                  |
| CrCl decreased                                                        | 0/31            | 0                   | 1/16             | 6.3                  |

\*Provided as colistimethate sodium. \*Based on investigator assessment. GFR, glomerular filtration rate; n/m, number of patients with event of interest/number of patients evaluable (for nephrotoxicity and AKI, those with a baseline Cr measurement and ≥1 Cr measurement following ≥1 dose of study therapy).  
Two IMI/REL patients with missing Cr values were excluded from nephrotoxicity/AKI analyses.  
**Protocol-specified nephrotoxicity:** CrCl was estimated by Cockcroft Gault equation (Cockcroft DW, Gault MH. *Nephron*. 1976;16[1]:31-41).  
**KDIGO (Kidney Disease: Improving Global Outcomes) Criteria:** KDIGO Acute Kidney Injury Work Group. KDIGO Clinical Practice Guideline for Acute Kidney Injury. *Kidney Int Suppl*. 2012 Mar;2(1):1-138.  
**RIFLE (Risk, Injury, Failure, Loss of kidney function, and End-stage kidney disease) Criteria:** GFR was estimated based on the Chronic Kidney Disease Epidemiology Collaboration equation (Levey AS, et al. *Ann Intern Med*. 2009;150[9]:604-612).

**Disclosures.** M. Brown, Merck & Co., Inc.: Employee, Salary. J. Motsch, Heidelberg University: Research Contractor, Research grant. K. Kaye, Merck & Co., Inc.: Consultant and Research Contractor, Research grant. Melinta, Achaogen, Allergan: Consultant, Consulting fee. T. File, Bio Merieux, Curetis, Melinta, Merck, MotifBio, Nabriva, Paratek, Pfizer: Consultant, Consulting fee. H. W. Boucher, Merck & Co., Inc.: Scientific Advisor, Consulting fee. N. Vendetti, Merck & Co., Inc.: Employee, Salary. A. Aggrey, Merck & Co., Inc.: Employee, Salary. H. K. Joeng, Merck & Co., Inc.: Employee, Salary. R. Tipping, Merck & Co., Inc.: Employee, Salary. J. Du, Merck & Co., Inc.: Employee, Salary. D. D. Depestel, Merck & Co., Inc.: Employee, Salary. J. Butterton, Merck & Co., Inc.: Employee, Salary and Stock. N. A. Kartsonis, Merck & Co., Inc.: Employee, Salary and Stocks. A. Paschke, Merck & Co., Inc.: Employee and Shareholder, Salary.

### 1952. Evaluation of Relapse and Reinfection Using Whole-Genome Sequencing of *Clostridium difficile* Isolates From Elderly Patients With *C. difficile* Infection (CDI) in the EXTEND Randomized, Controlled, Comparative Study of Extended-Pulsed Fidaxomicin and Vancomycin for the Treatment of CDI

Mark Wilcox, MD<sup>1,2</sup>; Oliver A. Cornely, MD<sup>3</sup>; Benoit Guery, MD<sup>4</sup>; Chris Longshaw, PhD<sup>5</sup>; Areti Georgopoli, MD<sup>5</sup>; Andreas Karas, MD<sup>6</sup>; Gbenga Kazeem, PhD<sup>7</sup>; Jose Alejandro Palacios-Fabrega, PhD<sup>7</sup> and Maria J.G.T. Vehreschild, MD<sup>8</sup>; <sup>1</sup>Leeds Teaching Hospitals and University of Leeds, Leeds, UK, <sup>2</sup>Leeds Institute of Biomedical and Clinical Sciences, University of Leeds, Leeds, UK, <sup>3</sup>Clinical Trials Centre Cologne (ZKS Köln), Cologne Excellence Cluster on Cellular Stress Responses in Aging-Associated Diseases, University of Cologne, Cologne, Germany, <sup>4</sup>University Hospital and University of Lausanne, Lausanne, Switzerland, <sup>5</sup>Astellas Pharma, Inc., Chertsey, UK, <sup>6</sup>Astellas Pharma Ltd., Chertsey, UK, <sup>7</sup>Astellas Pharma Europe Ltd., Chertsey, UK, <sup>8</sup>University Hospital of Cologne and German Centre for Infection Research, Partner Site Bonn-Cologne, Cologne, Germany

Session: 227. Clinical Trials

Saturday, October 6, 2018: 12:30 PM

**Background.** The EXTEND study demonstrated reduced 90-day recurrence rates for an extended-pulsed regimen of fidaxomicin (EPFX) vs. standard vancomycin (SV) in the treatment of *Clostridium difficile* infection (CDI): treatment difference -13%,  $P = 0.00073$ .<sup>1</sup> Whole-genome sequencing (WGS) is used to differentiate between
